# Supplementary material for: C. elegans colony formation as a condensation phenomenon
Source: PubMed Central journal article supplement (PMC8368178; doi:10.1038/s41467-021-25244-9), 2021-08-16
Supplement: 41467_2021_25244_MOESM2_ESM.pdf [file 41467_2021_25244_MOESM2_ESM.pdf]

### Description of Additional Supplementary Files

File Name: Supplementary Movie 1

Description: **Adult colony formation at high density.**

The initial density was 0.18 worms/mm<sup>2</sup>. The time stamp is in min:s and the total duration of the movie is 24 min.

File Name: Supplementary Movie 2

Description: **Adult worms at low density showing no colonies.**

The initial density was 0.01 worms/mm<sup>2</sup>. The time stamp is in min:s and the total duration of the movie is 24 min.

File Name: Supplementary Movie 3

Description: **Dauer worms dynamically entering and leaving a colony.**

Worms in the colony are false-colored yellow, and individual worms are false-colored blue. The worms' trajectories are initially colored blue and then progressively shift to yellow as time proceeds. Red asterisks denote events where worms entered the colony.

File Name: Supplementary Movie 4

Description: **Mixing of fluorescent and non-fluorescent worms to track single worm dynamics.**

The orange line denotes the boundary of the colony, which is made up mostly of nonfluorescent worms.
